# Supplementary material
Source: publisher site journal article supplement (https://www.dovepress.com/article/532323)
Supplement: Supplementary file 1 [file Supplementary%20materials.docx]

Supplementary Table 1 Epidemiological, Clinicopathological Parameters, and Adverse Reaction Information of B-NHL Patients

|  |  | ALL (N=488) | Plasma (N=394) | Serum (N=94) |
| --- | --- | --- | --- | --- |
| Age | Average | 57.8（16-85） | 58.2（16-85） | 57.3（18-82） |
| **<** 65 | 318 | 252（79.2%） | 66（20.8%） |
| ≥ 65 | 170 | 142（83.5%） | 28（16.5%） |
| Gender | Male | 246 | 206（83.7%） | 40（16.3%） |
| Female | 242 | 188（77.7%） | 54（22.3%） |
| Ann Arbor stage | Ⅰ-Ⅱ | 179 | 148（82.7%） | 31（17.3%） |
| Ⅲ-Ⅳ | 278 | 220（79.1%） | 58（20.9%） |
| Difficulty in tumor staging | 31 | 26（83.9%） | 5（16.1%） |
| Typing | GCB | 142 | 121（85.2%） | 21（14.8%） |
| Non-GCB | 182 | 151（38.3%） | 31（33.0%） |
| External involvement | Yes | 246 | 195（79.3%） | 51（20.7%） |
| No | 242 | 199（82.2%） | 43（17.8%） |
| Bone marrow suppression | ≥Grade III Bone Marrow Suppression | 74 | 68（91.9%） | 6（8.1%） |
| Systemic adverse reactions | ≥Grade III systemic adverse reactions | 92 | 83（90.2%） | 8（9.5%） |
| BMI | **<** 18.5 | 27 | 23（85.2%） | 4（14.8%） |
| 18.5 ≤ BMI **<** 28 | 398 | 320（80.4%） | 78（19.6%） |
| ≥ 28 | 63 | 51（81.0%） | 12（19.0%） |
| Smoking History | Yes | 79 | 65（82.2%） | 14（17.8%） |
| No | 409 | 329（80.4%） | 80（19.6%） |
| Drinking History | Yes | 28 | 23（82.1%） | 5（17.9%） |
| No | 460 | 371（80.7%） | 89（19.3%） |
| Family History of Tumors | Yes | 32 | 26（81.3%） | 6（18.7%） |
| No | 456 | 368（80.7%） | 88（19.3%） |
| CD3 | - | 330 | 270（81.8%） | 60（18.2%） |
| + | 101 | 81（80.2%） | 20（19.8%） |
| CD5 | - | 229 | 185（80.8%） | 44（19.2%） |
| + | 97 | 80（82.5%） | 17（17.5%） |
| CD10 | - | 196 | 151（77.0%） | 45（23.0%） |
| + | 227 | 189（83.3%） | 38（16.7%） |
| CD21 | - | 159 | 133（83.6%） | 26（16.4%） |
| + | 118 | 94（79.7%） | 24（20.3%） |
| Ki67 | < 80 | 212 | 166（78.3%） | 46（21.7%） |
| ≥ 80 | 238 | 197（82.8%） | 41（17.2%） |
| BCL2 | - | 64 | 55（85.9%） | 9（14.1%） |
| + | 362 | 295（81.5%） | 67（18.5%） |
| BCL6 | - | 57 | 46（80.7%） | 11（19.3%） |
| + | 374 | 306（81.8%） | 68（18.2%） |
| MUM1 | - | 64 | 55（85.9%） | 9（14.1%） |
| + | 327 | 265（81.0%） | 62（19.0%） |
| CyclinD1 | - | 283 | 233（82.3%） | 50（17.7%） |
| + | 30 | 24（80.0%） | 6（20.0%） |

Note：B-NHL (B-cell Non-Hodgkin Lymphoma); GCB: Germinal Center B cells; non-GCB: Non-germinal Center B cells; CD: Cluster of Differentiation; Bcl: B-cell Lymphoma; Mum-1: Multiple Myeloma Oncogene 1; Cyclin D1: G1/S-specific Cyclin D1; Ki-67 (%): Antigen KI67

Supplementary Table 2 Epidemiological, Clinicopathological Parameters and Adverse Reaction Information of B-NHL Subgroup Patients

| Clinical characteristics |  | DLBCL | FL | MZL | MCL | Other |
| --- | --- | --- | --- | --- | --- | --- |
| Number |  | 344 | 74 | 12 | 32 | 26 |
| Age | Average | 59.3（16-83） | 53.4（22-85） | 61.7（48-74） | 57.2（27-74） | 56.4（18-82） |
| < 65 | 211（61.3%） | 59（79.7%） | 6（50.0%） | 23（71.9%） | 19（73.1%） |
| ≥ 65 | 133（38.7%） | 15（20.3%） | 6（50.0%） | 9（28.1%） | 7（26.9%） |
| Gender | Male | 175（50.9%） | 34（45.9%） | 6（50.0%） | 18（56.3%） | 17（65.4%） |
| Female | 169（49.1%） | 40（54.1%） | 6（50.0%） | 14（43.7%） | 9（34.6%） |
| Ann Arbor stage | Ⅰ-Ⅱ | 137（39.8%） | 19（25.7%） | 2（16.7%） | 12（37.5%） | 11（42.3%） |
| Ⅲ-Ⅳ | 184（53.5%） | 55（74.3%） | 9（75.0%） | 19（59.4%） | 11（42.3%） |
| Typing | GCB | 142（41.3%） | - | - | - | - |
| Non-GCB | 182（52.9%） | - | - | - | - |
| External involvement | Yes | 177（51.5%） | 37（50.0%） | 9（75.0%） | 14（43.8%） | 9（34.6%） |
| No | 167（48.5%） | 37（50.0%） | 3（25.0%） | 18（56.2%） | 17（51.5%） |
| Bone marrow suppression | ≥Grade III Bone Marrow Suppression | 57（16.6%） | 10（13.5%） | 2（16.7%） | 4（12.5%） | 3（11.5%） |
| Systemic adverse reactions | ≥Grade III systemic adverse reactions | 70（20.3%） | 12（16.2%） | 2（16.7%） | 4（12.5%） | 4（15.4%） |
| Smoking History | Yes | 55（16.0%） | 14（18.9%） | 3（25.0%） | 2（6.3%） | 4（15.7%） |
| No | 289（84.0%） | 60（81.1%） | 9（75.0%） | 30（93.7%） | 22（84.3%） |
| Drinking History | Yes | 17（4.9%） | 6（8.1%） | 2（16.7%） | 0（0%） | 3（13.0%） |
| No | 327（95.1%） | 68（91.9%） | 10（83.3%） | 32（100%） | 23（87.0%） |
| Family History of Tumors | Yes | 24（7.0%） | 2（2.7%） | 1（8.3%） | 4（12.5%） | 0（0%） |
| No | 320（93%） | 72（97.3%） | 11（91.7%） | 28（87.5%） | 26（100%） |

Note：B-NHL (B-cell Non-Hodgkin Lymphoma)、 DLBCL( Diffuse large B cell Lymphoma )、FL ( Follicular Lymphoma )、MZL ( Marginal zone Lymphoma )、MCL ( Mantle-cell Lymphoma )、 Other（Chronic Lymphocytic Leukemia、Small B-cell Lymphoma、Burkitt Lymphoma）

Supplementary Table 3 Relationship Between Serum IL6 Expression Levels and Survival in Subgroups of B-NHL Patients

| Clinical characteristics | Amount | IL-6 | *P* | Mean estimate（PFS） | 95％CI | *P* | Mean estimate（EFS） | 95％CI |
| --- | --- | --- | --- | --- | --- | --- | --- | --- |
| Age |  |  |  |  |  |  |  |  |
| **<** 65 | 28 | Low | 0.217 | 40.459 | 34.139-46.780 | 0.146 | 40.459 | 34.139-46.780 |
| High | 27.194 | 21.736-32.652 | 25.675 | 19.698-31.652 |
| **≥ 65** | 66 | Low | 0.092 | 36.375 | 27.895-44.855 | **0.032** | 36.375 | 27.895-44.855 |
| High | 29.179 | 20.676-37.681 | 23.930 | 15.079-32.781 |
| Gender |  |  |  |  |  |  |  |  |
| Female | 54 | Low | 0.741 | 31.464 | 25.758-37.170 | 0.330 | 31.464 | 25.758-37.170 |
| High | 30.566 | 25.731-35.400 | 37.218 | 21.657-32.779 |
| **Male** | 40 | Low | **0.006** | 43.636 | 35.838-51.434 | **0.003** | 43.636 | 35.838-51.434 |
| High | 22.7131 | 13.913-31.513 | 20.935 | 11.618-30.252 |
| Ann Arbor stage |  |  |  |  |  |  |  |  |
| Ⅰ-Ⅱ | 31 | Low | 0.340 | 33.667 | 28.055-39.278 | 0.157 | 33.667 | 28.055-39.278 |
| High | 28.769 | 20.717-36.821 | 26.000 | 17.418-34.582 |
| Ⅲ-Ⅳ | 58 | Low | 0.244 | 38.534 | 30.692-46.375 | 0.107 | 37.534 | 30.692-46.375 |
| High | 28.058 | 21.448-34.667 | 25.506 | 18.510-32.503 |
| Typing |  |  |  |  |  |  |  |  |
| Non-GCB | 31 | Low | 0.969 | 22.100 | 12.405-31.795 | 0.745 | 22.100 | 12.405-31.795 |
| High | 24.857 | 16.803-32.911 | 22.619 | 14.607-30.631 |
| GCB | 21 | Low | 0.614 | 29.444 | 19.421-39.461 | 0.718 | 29.444 | 19.421-39.467 |
| High | 34.417 | 27.594-41.239 | 31.833 | 22.837-40.830 |
| External involvement |  |  |  |  |  |  |  |  |
| No | 43 | Low | 0.157 | 44.292 | 36.749-51.835 | 0.105 | 44.292 | 36.749-51.835 |
| High | 28.842 | 22.552-35.132 | 26.474 | 19.082-33.865 |
| Yes | 51 | Low | 0.264 | 30.969 | 25.162-36.776 | 0.084 | 30.969 | 25.162-36.776 |
| High | 28.464 | 21.382-35.546 | 24.958 | 17.704-32.212 |
| BMI |  |  |  |  |  |  |  |  |
| BMI **<** 18.5 | 4 | Low | 0.564 | The number of people is too small to be counted |  | 0.564 |  |  |
| High |  |  |  |
| **18.5 ≤ BMI < 28** | 78 | Low | 0.088 | 32.325 | 27.990-36.660 | **0.017** | 32.325 | 27.990-36.660 |
| High | 30.998 | 25.017-36.980 | 27.497 | 21.080-33.91  4 |
| BMI ≥ 28 | 12 | Low | 0.327 | 37.2 | 23.504-50.896 | 0.338 | 37.2 | 23.504-50.896 |
| High | 19.143 | 9.929-28.357 | 17.143 | 6.648-27.638 |
| CD3 |  |  |  |  |  |  |  |  |
| - | 60 | Low | 0.059 | 34.200 | 28.837-39.563 | 0.029 | 34.200 | 28.837-39.563 |
| High | 31.707 | 25.538-37.876 | 29.472 | 22.886-36.059 |
| **+** | 20 | Low | 0.088 | 41.192 | 31.272-51.113 | **0.008** | 41.192 | 31.272-51.113 |
| High | 21.000 | 10.881-31.119 | 15.000 | 5.382-24.618 |
| CD5 |  |  |  |  |  |  |  |  |
| - | 44 | Low | 0.342 | 33.895 | 27.661-40.129 | 0.183 | 33.895 | 27.661-40.129 |
| High | 35.783 | 29.081-42.486 | 32.644 | 24.972-40.315 |
| **+** | 17 | Low | 0.103 | 43.814 | 32.618-55.010 | **0.038** | 24.125 | 15.027-33.223 |
| High | 23.714 | 14.969-32.459 | 46.222 | 35.404-57.040 |
| CD10 |  |  |  |  |  |  |  |  |
| - | 45 | Low | 0.094 | 33.261 | 27.336-39.185 | 0.051 | 33.261 | 27.336-39.185 |
| High | 28.646 | 21.301-35.991 | 26.633 | 19.097-34.170 |
| + | 38 | Low | 0.082 | 45.829 | 39.019-52.639 | 0.068 | 45.829 | 39.019-52.639 |
| High | 28.469 | 21.20535.733 | 26.255 | 17.828-34.682 |
| CD21 |  |  |  |  |  |  |  |  |
| - | 26 | Low | 0.434 | 33.800 | 24.870-42.730 | 0.244 | 33.8 | 24.870-42.730 |
| High | 34.875 | 26.208-43.542 | 30.688 | 20.819-40.556 |
| + | 24 | Low | 0.300 | 42.714 | 32.316-53.113 | 0.080 | 42.714 | 32.316-53.113 |
| High | 24.8 | 15.299-34.301 | 19.4 | 8.928-29.872 |
| Ki67 |  |  |  |  |  |  |  |  |
| **<** 80 | 46 | Low | 0.105 | 45.903 | 39.851-51.954 | 0.092 | 45.903 | 39.851-51.954 |
| High | 28.889 | 22.706-35.071 | 27.468 | 20.640-34.295 |
| ≥ 80 | 41 | Low | 0.272 | 29.867 | 21.850-37.883 | 0.099 | 29.867 | 21.850-37.883 |
| High | 27.731 | 20.337-35.124 | 23.808 | 16.226-31.389 |
| BCL2 |  |  |  |  |  |  |  |  |
| - | 9 | Low | 0.539 | 16.167 | 4.903-27.430 | 0.624 | 16.167 | 4.903-27.430 |
| High | 26.000 | 13.501-3.499 | 15.667 | 0-35.187 |
| **+** | 67 | Low | **0.021** | 47.251 | 41.987-52.514 | **0.005** | 47.251 | 41.987-52.514 |
| High | 31.517 | 25.128-37.906 | 28.544 | 21.843-35.244 |
| BCL6 |  |  |  |  |  |  |  |  |
| - | 11 | Low | 0.273 |  |  | 0.273 |  |  |
| High |  |  |  |  |
| **+** | 68 | Low | 0.188 | 32.180 | 27.668-36.692 | **0.047** | 32.180 | 27.668-36.692 |
| High | 30.485 | 24.054-36.916 | 26.784 | 19.922-33.646 |
| MUM-1 |  |  |  |  |  |  |  |  |
| - | 9 | Low | 0.502 |  |  | 0.502 |  |  |
| High |  |  |  |  |
| + | 62 | Low | 0.054 | 44.963 | 38.773-51.153 | 0.024 | 44.963 | 38.773-51.153 |
| High | 30.030 | 23.517-36.543 | 27.667 | 20.778-34.555 |
| Cyclin D1 |  |  |  |  |  |  |  |  |
| - | 50 | Low | 0.384 | 44.960 | 38.277-51.643 | 0.196 | 44.960 | 38.277-51.643 |
| High | 35.744 | 29.084-42.405 | 32.491 | 24.787-40.195 |
| + | 6 | Low | 0.144 |  |  | 0.144 |  |  |
| High |  |  |  |  |

Note：Bold indicates *P* < 0.05, B-NHL (B-cell Non-Hodgkin Lymphoma)

Supplementary Table 4 Relationship Between Plasma IL-10 Expression Levels and Survival in Subgroups of B-NHL Patients

| Clinical characteristics | Amount | IL-6 | *P* | Mean estimate（PFS） | 95％CI | *P* | Mean estimate（EFS） | 95％CI |
| --- | --- | --- | --- | --- | --- | --- | --- | --- |
| Age |  |  |  |  |  |  |  |  |
| **< 65** | 252 | Low | **0.012** | 45.122 | 41.436-48.808 | **0.024** | 41.989 | 37.908-46.076 |
| High | 38.509 | 34.019-42.998 | 35.543 | 30.903-40.084 |
| ≥ 65 | 142 | Low | 0.372 | 50.244 | 45.142-55.346 | 0.750 | 46.081 | 40.268-51.895 |
| High | 47.207 | 40.767-53.647 | 45.207 | 38.642-51.952 |
| Gender |  |  |  |  |  |  |  |  |
| Female | 188 | Low | 0.306 | 49.370 | 44.396-54.345 | 0.314 | 46.515 | 41.127-51.904 |
| High | 43.386 | 38.872-47.900 | 40.700 | 35.913-45.486 |
| **Male** | 206 | Low | **0.026** | 40.637 | 36.169-45.105 | **0.032** | 41.979 | 37.819-46.140 |
| High | 36.548 | 30.388-42.708 | 370.19 | 30.759-43.278 |
| Ann Arbor stage |  |  |  |  |  |  |  |  |
| Ⅰ-Ⅱ | 148 | Low | 0.148 | 37.315 | 35.047-39.582 | 0.412 | 34.845 | 31.928-37.762 |
| High | 47.377 | 39.203-55.551 | 44.874 | 35.610-54.139 |
| Ⅲ-Ⅳ | 220 | Low | 0.05 | 46.377 | 41.477-51.277 | 0.613 | 39.558 | 34.241-44.875 |
| High | 37.141 | 32.620-41.662 | 36.196 | 31.120-41.272 |
| Typing |  |  |  |  |  |  |  |  |
| **Non-GCB** | 151 | Low | **0.044** | 43.769 | 39.298-48.227 | 0.337 | 32.523 | 28.989-36.057 |
| High | 29.395 | 25.881-32.909 | 28.874 | 25.301-32.446 |
| GCB | 121 | Low | 0.845 | 39.605 | 34.377-44.834 | 0.942 | 29.937 | 26.068-33.806 |
| High | 32.858 | 29.114-36.601 | 30.746 | 26.665-34.828 |
| External involvement |  |  |  |  |  |  |  |  |
| **No** | 199 | Low | **0.024** | 51.678 | 47.446-55.910 | 0.277 | 45.755 | 40.649-50.862 |
| High | 43.839 | 38.430-49.248 | 41.329 | 35.699-46.959 |
| Yes | 195 | Low | 0.114 | 37.373 | 34.114-40.631 | 0.054 | 36.164 | 32.670-39.658 |
| High | 39.338 | 33.857-44.819 | 36.389 | 30.630-42.148 |
| BMI |  |  |  |  |  |  |  |  |
| BMI **<** 18.5 | 23 | Low | 0.222 | 34.833 | 27.028-42.639 | 0.282 | 31.583 | 22.348-40.818 |
| High | 24.909 | 15.900-33.918 | 19.600 | 11.663-27.537 |
| 18.5 **≤** BMI **<** 28 | 320 | Low | 0.101 | 48.945 | 45.074-52.815 | 0.065 | 46.836 | 42.6698-50-975 |
| High | 41.174 | 37.126-45.223 | 38.542 | 34.332-42.751 |
| **BMI ≥ 28** | 51 | Low | **0.010** | 48.732 | 43.040-54.425 | 0.430 | 38.823 | 30.663-46.983 |
| High | 37.026 | 25.054-48.998 | 36.526 | 24.309-48.743 |
| CD3 |  |  |  |  |  |  |  |  |
| **-** | 270 | Low | **0.005** | 40.253 | 37.654-42.853 | **0.011** | 38.009 | 35.096-40.922 |
| High | 40.396 | 36.354-44.438 | 37.958 | 33.753-42.162 |
| + | 81 | Low | 0.716 | 45.353 | 37.571-53.134 | 0.976 | 39.817 | 31.094-48.541 |
| High | 44.511 | 36.138-52.885 | 41.550 | 32.857-50.244 |
| CD5 |  |  |  |  |  |  |  |  |
| **-** | 185 | Low | **0.002** | 53.917 | 49.482-58.352 | **0.013** | 49.159 | 43.833-54.485 |
| High | 29.917 | 26.938-32.897 | 27.844 | 24.651-31.037 |
| + | 80 | Low | 0.736 | 39.385 | 31.357-47.413 | 0.745 | 33.374 | 24.874-41.874 |
| High | 44.905 | 37.450-52.361 | 42.079 | 34.219-49.939 |
| CD10 |  |  |  |  |  |  |  |  |
| **-** | 151 | Low | **0.010** | 40.803 | 37.715-43.890 | 0.075 | 38.141 | 34.512-41.771 |
| High | 29.973 | 26.997-32.948 | 29.258 | 26.213-32.302 |
| + | 189 | Low | 0.572 | 47.287 | 41.853-52.722 | 0.229 | 44.226 | 38.377-50.076 |
| High | 41.839 | 36.434-47.243 | 36.416 | 30.533-42.299 |
| CD21 |  |  |  |  |  |  |  |  |
| **-** | 133 | Low | **0.021** | 39.982 | 35.521-42.442 | **0.026** | 36.519 | 32.517-40.520 |
| High | 29.594 | 25.784-33.405 | 25.505 | 21.835-29.176 |
| + | 94 | Low | 0.494 | 46.564 | 41.281-51.848 | 0.951 | 41.952 | 35.612-48.292 |
| High | 48.993 | 42.278-55.708 | 47.556 | 40.504-54.607 |
| Ki67 |  |  |  |  |  |  |  |  |
| **Ki67 < 80** | 166 | Low | **0.012** | 45.664 | 41.228-50.099 | 0.051 | 41.446 | 36.326-46.566 |
| High | 41.416 | 35.750-47.082 | 38.399 | 32.493-44.305 |
| Ki67 ≥ 80 | 197 | Low | 0.585 | 49.391 | 44.955-53.827 | 0.614 | 46.429 | 41.578-51.281 |
| High | 32.044 | 29.185-34.903 | 30.199 | 27.124-33.274 |
| BCL2 |  |  |  |  |  |  |  |  |
| **-** | 55 | Low | **0.041** | 41.503 | 37.713-45.292 | 0.172 | 39.219 | 34.519-43.918 |
| High | 29.887 | 23.063-36.712 | 29.887 | 23.063-36.712 |
| + | 295 | Low | 0.076 | 48.148 | 43.926-52.369 | 0.099 | 44.828 | 40.205-49.450 |
| High | 44.160 | 40.001-48.318 | 41.025 | 36.666-45.383 |
| BCL6 |  |  |  |  |  |  |  |  |
| - | 46 | Low | 0.117 | 42.850 | 37.372-48.328 | 0.266 | 40.700 | 34.108-47.292 |
| High | 29.601 | 23.515-35.686 | 29.601 | 23.515-35.686 |
| **+** | 306 | Low | **0.028** | 43.881 | 40.821-46.941 | **0.043** | 35.942 | 33.137-38.747 |
| High | 44.953 | 40.794-49.112 | 41.431 | 37.038-45.8224 |
| MUM-1 |  |  |  |  |  |  |  |  |
| **-** | 55 | Low | **0.017** | 52.696 | 41.708-63.684 | **0.058** | 46.870 | 33.773-59.966 |
| High | 35.647 | 26.617-44.676 | 32.924 | 23.983-41.865 |
| + | 265 | Low | 0.120 | 45.575 | 42.230-48.920 | 0.227 | 42.266 | 38.481-46.051 |
| High | 31.323 | 28.792-33.855 | 29.553 | 26.839-32.267 |
| Cyclin D1 |  |  |  |  |  |  |  |  |
| **-** | 233 | Low | **0.030** | 50.620 | 46.304-54.936 | **0.040** | 46.374 | 41.445-51.302 |
| High | 45.693 | 41.011-50.375 | 41.402 | 36.375-46.429 |
| + | 24 | Low | 0.544 | 29.778 | 21.646-37.910 | 0.739 | 25.667 | 16.047-35.287 |
| High | 28.293 | 21.591-34.994 | 25.183 | 18.102-32.264 |

Note：Bold indicates *P* < 0.05, B-NHL (B-cell Non-Hodgkin Lymphoma)

Supplementary Table 5 Cox Regression Analysis of Factors Affecting EFS in Serum Samples from B-NHL Patients Treated with Rituximab

| Clinical characteristics |  |  |  | EFS |  |  |  |
| --- | --- | --- | --- | --- | --- | --- | --- |
|  |  | Univariate |  |  | Multivariate |  |
|  | *P* | Hazard ratio | 95% CI | *P* | Hazard ratio | 95% CI |
| **IL-6** | Low vs High | **0.015** | 2.212 | 1.170-4.184 | 0.745 | 1.165 | 0.4465-2.915 |
| IL-10 | Low vs High | 0.991 | 0.996 | 0.540-1.839 |  |  |  |
| Age | < 65 vs ≥ 65 | 0.464 | 1.278 | 0.662-2.496 |  |  |  |
| Gender | Female vs Male | 0.668 | 1.145 | 0.617-2.122 |  |  |  |
| Ann Arbor stage | I-II vs III-IV | 0.131 | 1.740 | 0.847-3.572 |  |  |  |
| **Typing** | No vs Yes | **0.041** | 0.385 | 0.154-0.962 | 0.115 | 0.466 | 0.180-1.206 |
| Extranodal involvemen | No vs Yes | 0.149 | 1.596 | 0.845-3.105 |  |  |  |
| Smoking History | No vs Yes | 0.263 | 0.555 | 0.198-1.558 |  |  |  |
| Drinking History | No vs Yes | 0.477 | 1.533 | 0.472-4.975 |  |  |  |
| Family History of Tumors | No vs Yes | 0.245 | 0.308 | 0.042-2.242 |  |  |  |
| CD3 | Negative vs Positive | 0.273 | 1.500 | 0.727-3.095 |  |  |  |
| CD5 | Negative vs Positive | 0.458 | 1.390 | 0.583-3.315 |  |  |  |
| CD10 | Negative vs Positive | 0.292 | 0.686 | 0.341-1.381 |  |  |  |
| CD21 | Negative vs Positive | 0.716 | 1.182 | 0.480-2.912 |  |  |  |
| Ki-67(%) | < 80% vs ≥ 80% | 0.070 | 1.827 | 0.952-3.506 |  |  |  |
| **BCL2** | Negative vs Positive | **0.021** | 0.345 | 0.140-0.849 | **0.047** | 0.366 | 0.136-0.988 |
| BCL6 | Negative vs Positive | 0.083 | 5.823 | 0.793-42.732 |  |  |  |
| MUM-1 | Negative vs Positive | 0.816 | 1.153 | 0.348-3.821 |  |  |  |
| Cyclin D1 | Negative vs Positive | 0.408 | 1.682 | 0.491-5.761 |  |  |  |

Note：Bold indicates *P* < 0.05, B-NHL (B-cell Non-Hodgkin Lymphoma)

Supplementary Table 6 Cox Regression Analysis of Factors Affecting PFS in Serum Samples of B-NHL Patients Treated with Rituximab

| Clinical characteristics |  |  |  | PFS |  |  |  |
| --- | --- | --- | --- | --- | --- | --- | --- |
|  |  | Univariate |  |  | Multivariate |  |
|  | *P* | Hazard ratio | 95% CI | *P* | Hazard ratio | 95% CI |
| IL-6 | Low vs High | 0.061 | 1.583 | 0.971-3.536 |  |  |  |
| IL-10 | Low vs High | 0.640 | 0.861 | 0.458-1.615 |  |  |  |
| Age | < 65 vs ≥ 65 | 0.993 | 0.997 | 0.496-2.003 |  |  |  |
| Gender | Female vs Male | 0.437 | 1.284 | 0.684-2.410 |  |  |  |
| Ann Arbor stage | I-II vs III-IV | 0.108 | 1.852 | 0.873-3.928 |  |  |  |
| **Typing** | No vs Yes | **0.037** | 0.375 | 0.149-0.943 | **0.064** | 0.405 | 0.156-1.054 |
| Extranodal involvemen | No vs Yes | 0.219 | 1.499 | 0.786-2.858 |  |  |  |
| Smoking History | No vs Yes | 0.331 | 0.599 | 0.213-1.686 |  |  |  |
| Drinking History | No vs Yes | 0.422 | 1.622 | 0.498-5.283 |  |  |  |
| Family History of Tumors | No vs Yes | 0.283 | 0.337 | 0.046-2.453 |  |  |  |
| CD3 | Negative vs Positive | 0.371 | 1.410 | 0.664-2.996 |  |  |  |
| CD5 | Negative vs Positive | 0.299 | 1.595 | 0.661-3.849 |  |  |  |
| CD10 | Negative vs Positive | 0.344 | 0.711 | 0.351-1.441 |  |  |  |
| CD21 | Negative vs Positive | 0.707 | 1.201 | 0.463-3.115 |  |  |  |
| Ki-67(%) | < 80% vs ≥ 80% | 0.164 | 1.604 | 0.824-3.122 |  |  |  |
| **BCL2** | Negative vs Positive | **0.027** | 0.360 | 0.145-0.890 | 0.050 | 0.383 | 0.147-1.002 |
| BCL6 | Negative vs Positive | 0.102 | 5.280 | 0.718-38.836 |  |  |  |
| MUM-1 | Negative vs Positive | 0.935 | 1.052 | 0.316-3.496 |  |  |  |
| Cyclin D1 | Negative vs Positive | 0.304 | 1.914 | 0.555-6.592 |  |  |  |

Note：Bold indicates *P* < 0.05, B-NHL (B-cell Non-Hodgkin Lymphoma)

Supplementary Table 7 Cox Regression Analysis of Factors Affecting PFS in B-NHL Patients Treated with Rituximab in Plasma Samples

| Clinical characteristics |  |  |  | PFS |  |  |  |
| --- | --- | --- | --- | --- | --- | --- | --- |
|  |  | Univariate |  |  | Multivariate |  |
|  | *P* | Hazard ratio | 95% CI | *P* | Hazard ratio | 95% CI |
| IL-6 | Low vs High | 0.771 | 0.942 | 0.631-1.407 |  |  |  |
| **IL-10** | Low vs High | **0.008** | 1.731 | 1.152-2.602 | **0.017** | 1.669 | 1.097-2.537 |
| Age | < 65 vs ≥ 65 | 0.148 | 0.729 | 0.475-1.119 |  |  |  |
| Gender | Female vs Male | 0.0.204 | 1.294 | 0.869-1.926 |  |  |  |
| **Ann Arbor stage** | I-II vs III-IV | **0.001** | 2.247 | 1.404-3.597 | **0.001** | 2.179 | 1.360-3.490 |
| Typing | No vs Yes | 0.206 | 0.712 | 0.421-1.205 |  |  |  |
| Extranodal involvemen | No vs Yes | 0.373 | 1.197 | 0.806-1.776 |  |  |  |
| Smoking History | No vs Yes | 0.633 | 0.871 | 0.494-1.535 |  |  |  |
| Drinking History | No vs Yes | 0.805 | 0.893 | 0.363-2.197 |  |  |  |
| Family History of Tumors | No vs Yes | 0.633 | 1.206 | 0.559-2.605 |  |  |  |
| CD3 | Negative vs Positive | 0.571 | 1.147 | 0.714-1.844 |  |  |  |
| CD5 | Negative vs Positive | 0.190 | 1.401 | 0.846-2.318 |  |  |  |
| CD10 | Negative vs Positive | 0.603 | 1.120 | 0.730-1.720 |  |  |  |
| CD21 | Negative vs Positive | 0.489 | 0.816 | 0.459-1.451 |  |  |  |
| Ki-67(%) | < 80% vs ≥ 80% | 0.363 | 0.825 | 0.546-1.248 |  |  |  |
| BCL2 | Negative vs Positive | 0.147 | 1.666 | 0.836-3.322 |  |  |  |
| BCL6 | Negative vs Positive | 0.830 | 1.075 | 0.555-2.081 |  |  |  |
| MUM-1 | Negative vs Positive | 0.459 | 0.807 | 0.458-1.423 |  |  |  |
| Cyclin D1 | Negative vs Positive | 0.127 | 1.695 | 0.861-3.336 |  |  |  |

Note：Bold indicates *P* < 0.05, B-NHL (B-cell Non-Hodgkin Lymphoma)

Supplementary Table 8 Cox Regression Analysis of Factors Affecting EFS in B-NHL Patients Treated with Rituximab in Plasma Samples

| Clinical characteristics |  |  |  | EFS |  |  |  |
| --- | --- | --- | --- | --- | --- | --- | --- |
|  |  | Univariate |  |  | Multivariate |  |
|  | *P* | Hazard ratio | 95% CI | *P* | Hazard ratio | 95% CI |
| IL-6 | Low vs High | 0.826 | 1.042 | 0.724-1.498 |  |  |  |
| **IL-10** | Low vs High | **0.035** | 1.480 | 1.028-2.130 | 0.057 | 1.440 | 0.989-2.097 |
| Age | < 65 vs ≥ 65 | 0.138 | 0.746 | 0.506-1.099 |  |  |  |
| Gender | Female vs Male | 0.150 | 1.304 | 0.909-1.873 |  |  |  |
| **Ann Arbor stage** | I-II vs III-IV | **0.001** | 1.974 | 1.300-2.998 | **0.002** | 1.933 | 1.272-2.937 |
| Typing | No vs Yes | 0.454 | 0.838 | 0.528-1.331 |  |  |  |
| Extranodal involvemen | No vs Yes | 0.883 | 1.027 | 0.718-1.469 |  |  |  |
| Smoking History | No vs Yes | 0.547 | 0.854 | 0.5111-1.428 |  |  |  |
| Drinking History | No vs Yes | 0.405 | 0.683 | 0.279-1.674 |  |  |  |
| Family History of Tumors | No vs Yes | 0.808 | 1.093 | 0.533-2.243 |  |  |  |
| CD3 | Negative vs Positive | 0.349 | 1.229 | 0.798-1.891 |  |  |  |
| CD5 | Negative vs Positive | 0.180 | 1.359 | 0.868-2.127 |  |  |  |
| CD10 | Negative vs Positive | 0.204 | 1.286 | 0.872-1.897 |  |  |  |
| CD21 | Negative vs Positive | 0.484 | 0.833 | 0.499-1.390 |  |  |  |
| Ki-67(%) | < 80% vs ≥ 80% | 0.268 | 0.809 | 0.557-1.176 |  |  |  |
| BCL2 | Negative vs Positive | 0.108 | 1.669 | 0.893-3.118 |  |  |  |
| BCL6 | Negative vs Positive | 0.468 | 1.261 | 0.675-2.356 |  |  |  |
| MUM-1 | Negative vs Positive | 0.361 | 0.790 | 0.477-1.310 |  |  |  |
| Cyclin D1 | Negative vs Positive | 0.125 | 1.617 | 0.875-2.987 |  |  |  |

Note：Bold indicates *P* < 0.05, B-NHL (B-cell Non-Hodgkin Lymphoma)


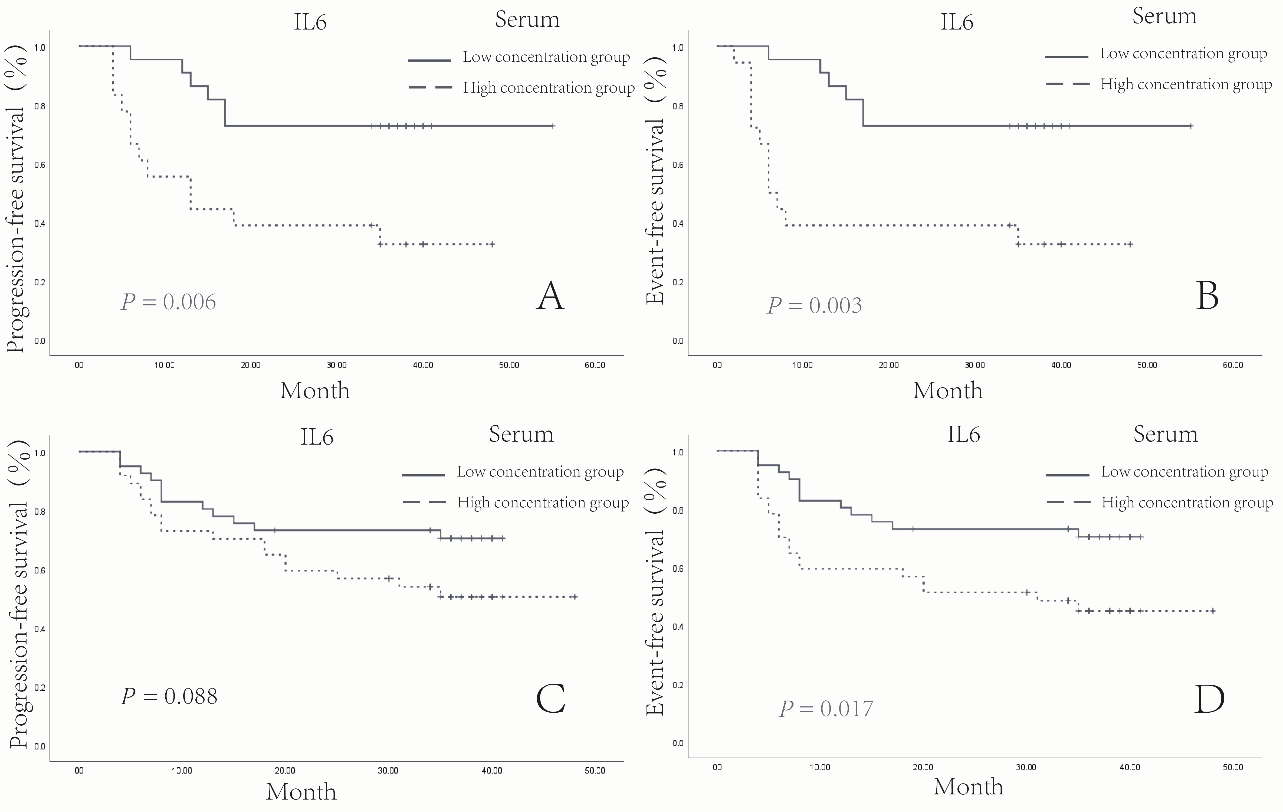


**Supplementary Figure 1. Kaplan-Meier curve demonstrating the correlation between serum IL6 levels and PFS (A) and EFS (B) in male B-NHL patients; correlation between serum IL6 levels and PFS (C) and EFS (D) in B-NHL patients with 18.5 ≤ BMI ＜ 28.**


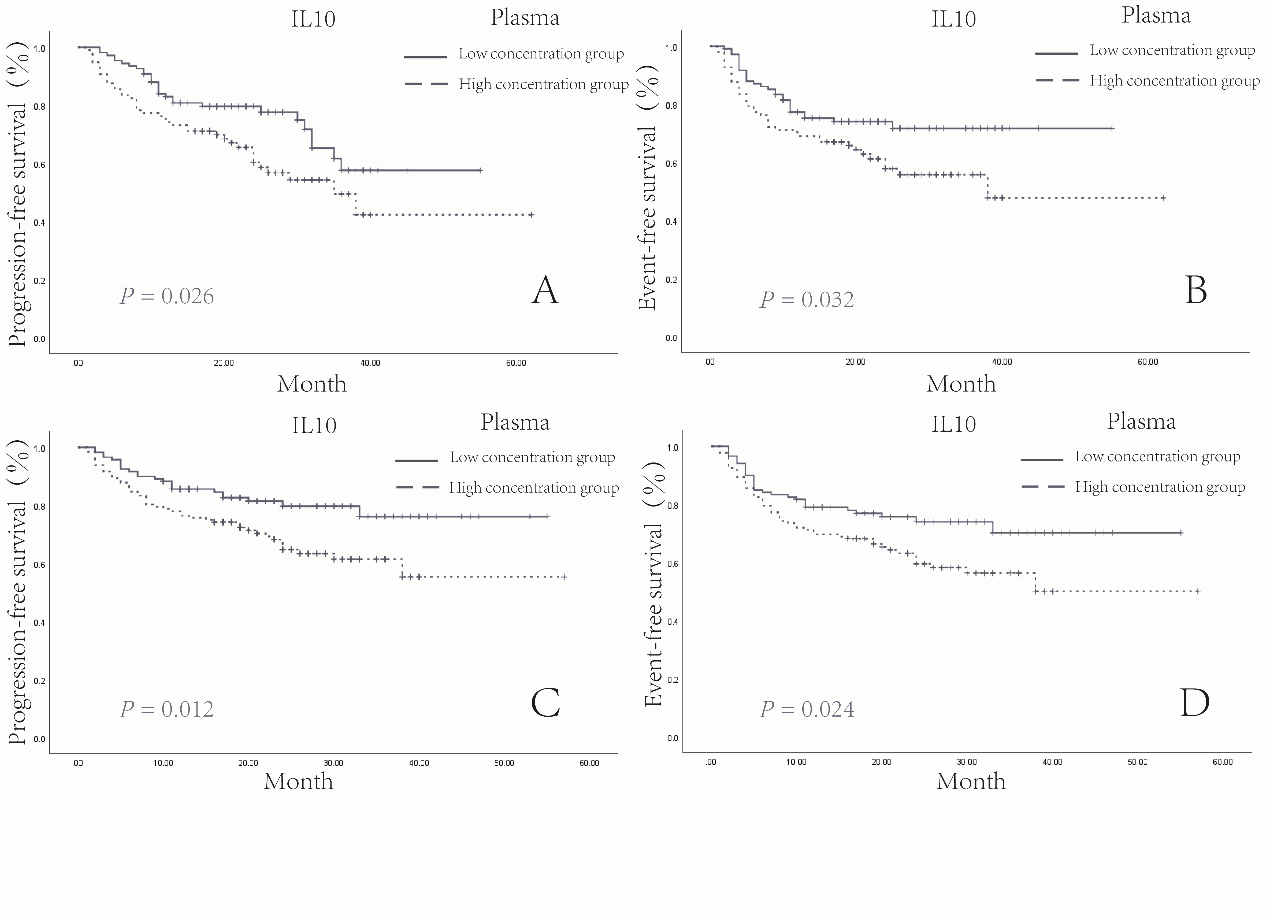


**Supplementary Figure 2. Kaplan-Meier curve showing the correlation between plasma IL10 levels and PFS (A) and EFS (B) in male B-NHL patients; correlation between plasma IL10 levels and PFS (C) and EFS (D) in B-NHL patients under 65 years of age.**


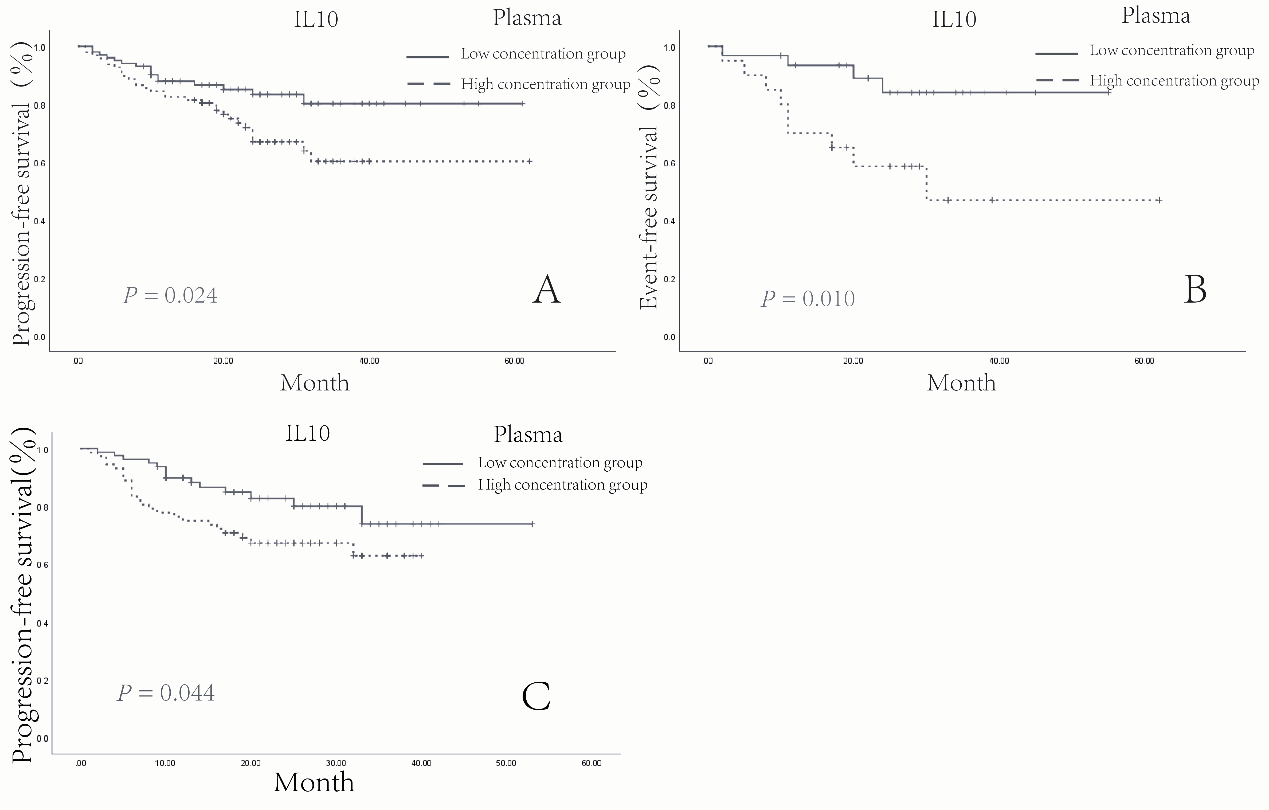


**Supplementary Figure 3. Kaplan-Meier curves show the correlation between plasma IL-10 levels and progression-free survival (PFS) in B-NHL patients with no extranodal involvement (A), BMI ≥ 28 (B) and non-GCB (C).**


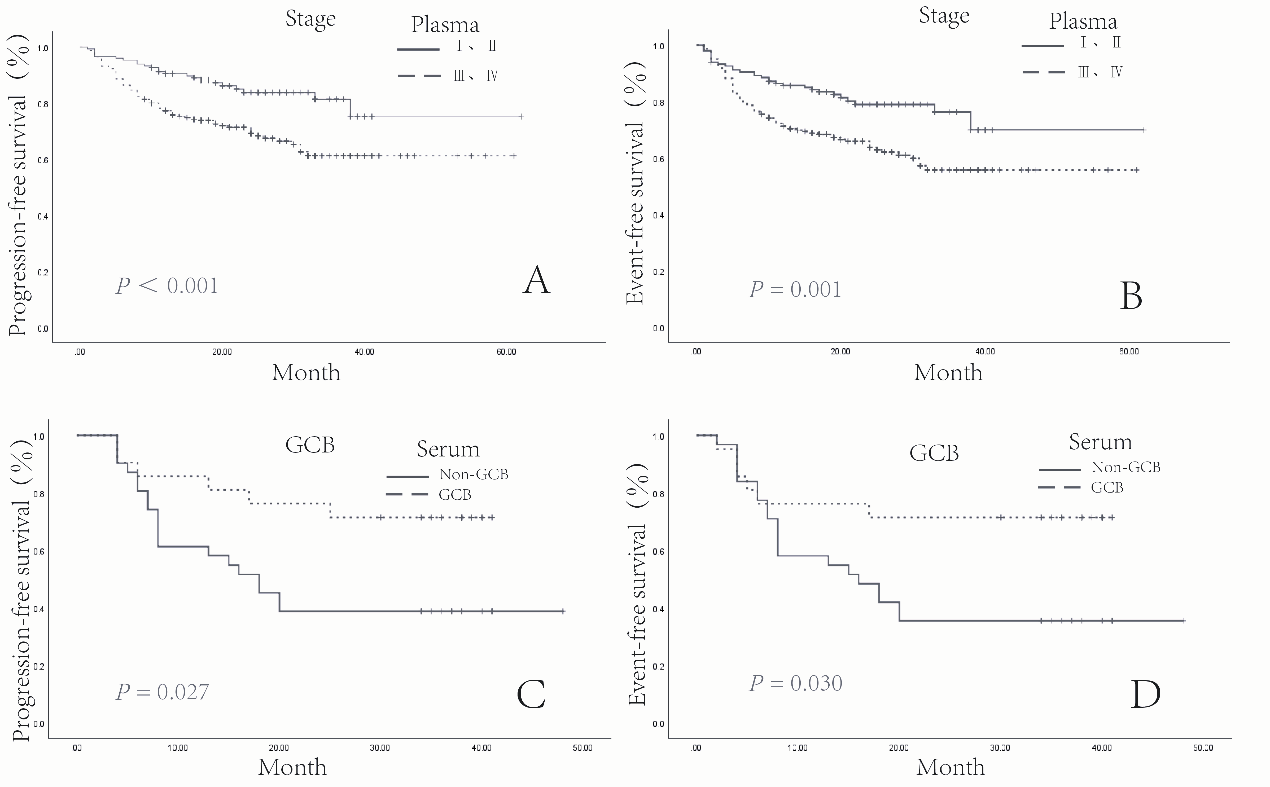


**Supplementary Figure 4. Kaplan-Meier curve showing the correlation between tumor staging and PFS (A) and EFS (B) in patients from whom plasma was collected; correlation between germinal center origin and PFS (C) and EFS (D) in patients from whom serum was collected.**
